# Supplementary material for: The combination approach of SVM and ECOC for powerful identification and classification of transcription factor
Source: Springer Nature journal article supplement (doi:10.1186/1471-2105-9-282), 2008-06-16
Supplement: 12859_2008_2267_MOESM1_ESM.pdf [file 12859_2008_2267_MOESM1_ESM.pdf]

Swiss-Prot accession number of transcription factor(450)

|        |        |        |        |        |        |        |        |        |        |
|--------|--------|--------|--------|--------|--------|--------|--------|--------|--------|
| O00268 | O00499 | O01667 | O08961 | O35160 | O49746 | O82132 | P01102 | P01105 | P01129 |
| P02835 | P02836 | P03069 | P03134 | P03206 | P03211 | P04147 | P04198 | P04386 | P04637 |
| P05084 | P05085 | P05549 | P05552 | P05709 | P06100 | P06102 | P06401 | P06492 | P06839 |
| P06844 | P07247 | P07248 | P07261 | P07269 | P07270 | P07272 | P07273 | P07548 | P07664 |
| P08235 | P08638 | P08833 | P08970 | P09022 | P09077 | P09081 | P09085 | P09089 | P09090 |
| P09547 | P09775 | P09959 | P10069 | P10071 | P10084 | P10105 | P10180 | P10181 | P10193 |
| P10242 | P10508 | P10627 | P10840 | P10842 | P10862 | P10961 | P11115 | P11161 | P11420 |
| P11499 | P11536 | P11638 | P11746 | P11747 | P11831 | P11938 | P12351 | P12383 | P13002 |
| P13054 | P13098 | P13360 | P13526 | P13528 | P13902 | P14232 | P14233 | P14404 | P14653 |
| P14734 | P14922 | P15330 | P15370 | P15498 | P15619 | P15822 | P16220 | P16236 | P16241 |
| P16443 | P16649 | P16989 | P17095 | P17106 | P17433 | P17542 | P17861 | P18074 | P18102 |
| P18146 | P18488 | P18491 | P18756 | P18846 | P18848 | P19212 | P19360 | P19419 | P19532 |
| P19880 | P20052 | P20134 | P20227 | P20269 | P20293 | P20428 | P20482 | P20659 | P20749 |
| P20824 | P21192 | P21525 | P21657 | P22035 | P22082 | P22121 | P22265 | P22336 | P22560 |
| P22579 | P22670 | P22697 | P22810 | P22813 | P22816 | P22893 | P22980 | P23023 | P23202 |
| P23255 | P23615 | P23683 | P23760 | P23769 | P23803 | P23906 | P24278 | P24345 | P24349 |
| P25032 | P25042 | P25302 | P25364 | P25425 | P25799 | P25932 | P25991 | P26017 | P26343 |
| P26359 | P26370 | P26754 | P26798 | P26801 | P27347 | P27540 | P27692 | P27705 | P27889 |
| P27898 | P28159 | P28167 | P28324 | P28362 | P28574 | P29056 | P29084 | P29303 | P29454 |
| P29747 | P31260 | P31263 | P31264 | P31273 | P31314 | P31367 | P31384 | P32183 | P32333 |
| P32338 | P32389 | P32445 | P32479 | P32480 | P32558 | P32591 | P32607 | P32773 | P32774 |
| P32776 | P32780 | P32805 | P32862 | P33076 | P33244 | P33308 | P33339 | P33400 | P33748 |
| P34228 | P34233 | P34707 | P34708 | P34765 | P34909 | P35189 | P35428 | P35452 | P35632 |
| P35638 | P35710 | P35817 | P35869 | P36011 | P36100 | P36130 | P36395 | P36611 | P36622 |
| P36627 | P36631 | P36956 | P37366 | P37826 | P38114 | P38128 | P38141 | P38165 | P38530 |
| P38699 | P38704 | P38717 | P38749 | P38806 | P38827 | P38830 | P38889 | P38915 | P39001 |
| P39008 | P39073 | P39113 | P39521 | P39678 | P39720 | P39880 | P40068 | P40209 | P40349 |
| P40427 | P40469 | P40535 | P40573 | P40578 | P40798 | P40956 | P40971 | P41157 | P41164 |
| P41182 | P41546 | P41696 | P41813 | P41895 | P41896 | P41933 | P41934 | P42230 | P42232 |
| P42282 | P43345 | P43569 | P43680 | P46581 | P46676 | P46677 | P46678 | P46692 | P46954 |
| P46974 | P46995 | P47175 | P47821 | P47977 | P47988 | P48361 | P48985 | P49640 | P49698 |
| P49848 | P49866 | P49906 | P50104 | P50105 | P50220 | P50575 | P50947 | P51123 | P51179 |
| P51558 | P51843 | P51948 | P51974 | P52654 | P52890 | P53032 | P53040 | P53050 | P53064 |
| P53094 | P53438 | P53566 | P53743 | P53968 | P54000 | P54785 | P54845 | P55316 | P56915 |
| P78411 | P91943 | P93835 | P93839 | P97503 | Q00420 | Q00453 | Q00578 | Q00916 | Q00969 |
| Q00978 | Q01094 | Q01159 | Q01371 | Q01522 | Q01664 | Q01714 | Q01822 | Q01842 | Q01981 |
| Q02100 | Q02206 | Q02283 | Q02336 | Q02457 | Q02486 | Q02556 | Q02638 | Q02983 | Q03017 |
| Q03062 | Q03123 | Q03125 | Q03164 | Q03465 | Q03654 | Q04226 | Q04635 | Q04650 | Q04667 |
| Q04673 | Q04688 | Q05021 | Q05066 | Q05192 | Q05344 | Q05466 | Q05738 | Q05913 | Q05950 |
| Q05959 | Q06433 | Q06596 | Q06706 | Q06945 | Q07472 | Q07687 | Q08050 | Q12030 | Q12041 |
| Q12206 | Q12514 | Q13952 | Q14119 | Q14872 | Q15543 | Q15697 | Q15853 | Q17381 | Q17396 |
| Q24142 | Q24143 | Q24206 | Q24266 | Q24338 | Q26635 | Q38895 | Q39028 | Q39155 | Q39235 |
| Q39260 | Q40476 | Q40477 | Q40478 | Q40479 | Q42575 | Q43614 | Q60542 | Q60636 | Q60688 |
| Q60793 | Q60987 | Q61026 | Q61164 | Q61575 | Q61985 | Q62722 | Q63046 | Q63187 | Q63244 |
| Q63753 | Q64732 | Q91839 | Q91853 | Q92731 | Q98875 | Q99814 | Q9UH73 | Q9Z205 | Q9ZWM9 |

Swiss-Prot accession number of non transcription factor(1727)

|        |        |        |        |        |        |        |        |        |        |
|--------|--------|--------|--------|--------|--------|--------|--------|--------|--------|
| A0JN69 | A1X157 | A2VDL8 | O00311 | O00399 | O00443 | O00444 | O00459 | O00499 | O01510 |
| O01991 | O02697 | O02703 | O02810 | O05543 | O05871 | O06079 | O06081 | O07086 | O07898 |
| O07899 | O07900 | O08788 | O08874 | O13731 | O13733 | O13817 | O13839 | O13889 | O13932 |
| O14328 | O14350 | O14523 | O14525 | O14618 | O14936 | O14976 | O15021 | O15818 | O16277 |
| O18209 | O22040 | O23372 | O24585 | O26929 | O27995 | O28739 | O29470 | O29666 | O29910 |
| O31540 | O31663 | O32153 | O32156 | O32221 | O32848 | O34368 | O34638 | O34664 | O35094 |
| O35099 | O35569 | O35600 | O35926 | O41933 | O42282 | O42632 | O42894 | O42900 | O43066 |
| O43077 | O43155 | O43164 | O43283 | O43422 | O43572 | O43586 | O43683 | O43818 | O44406 |
| O44739 | O44757 | O46560 | O46607 | O48850 | O49203 | O49227 | O52655 | O52728 | O54101 |
| O54709 | O54830 | O54991 | O55034 | O58969 | O59739 | O59836 | O60017 | O60079 | O60125 |
| O60264 | O60291 | O60337 | O60524 | O60739 | O60763 | O60841 | O60844 | O60870 | O61661 |
| O63264 | O64474 | O67174 | O67879 | O68562 | O70405 | O73777 | O73943 | O74208 | O74248 |
| O74442 | O74526 | O74539 | O74630 | O74815 | O74925 | O75146 | O75154 | O75391 | O75409 |
| O75460 | O75494 | O75569 | O75602 | O76039 | O77617 | O78474 | O80536 | O80568 | O83433 |
| O84121 | O84417 | O84419 | O84462 | O84880 | O86230 | O87120 | O87394 | O87656 | O88627 |
| O88875 | O93654 | O94269 | O94324 | O94513 | O94603 | O94647 | O94751 | O94953 | O95071 |
| O95202 | O95487 | O95711 | O95835 | P00522 | P00536 | P00545 | P00557 | P00996 | P01831 |
| P01882 | P02829 | P03073 | P03076 | P03153 | P03177 | P03179 | P03182 | P03218 | P03243 |
| P03701 | P03880 | P03949 | P03987 | P04072 | P04185 | P04233 | P04294 | P04385 | P04413 |
| P05725 | P05825 | P06501 | P06729 | P06916 | P07072 | P07074 | P07211 | P07277 | P07527 |

|        |        |        |        |        |        |        |        |        |        |
|--------|--------|--------|--------|--------|--------|--------|--------|--------|--------|
| P08018 | P08571 | P08575 | P08922 | P09319 | P09326 | P09564 | P09888 | P09932 | P09979 |
| P0A0V2 | P0A1I2 | P0A1K7 | P0A1K9 | P0A234 | P0A3U4 | P0A4M7 | P0A4N1 | P0A5B8 | P0A5N9 |
| P0A5Z9 | P0A619 | P0A647 | P0AA48 | P0AA65 | P0AA69 | P0AA74 | P0AA94 | P0AAE1 | P0ABT9 |
| P0AD04 | P0AD29 | P0AD47 | P0ADJ8 | P0ADP6 | P0AE35 | P0AE47 | P0AEB6 | P0AEC2 | P0AEC7 |
| P0AEI0 | P0AEL5 | P0AEW8 | P0AF81 | P0AFN8 | P0AFQ0 | P0AFW6 | P0COL8 | P0COT1 | P0C198 |
| P0C1B1 | P0C219 | P0C264 | P0C536 | P10047 | P11049 | P11075 | P11108 | P11461 | P11792 |
| P11912 | P12136 | P12401 | P12812 | P12868 | P13036 | P13186 | P13227 | P13288 | P13299 |
| P13329 | P13340 | P13423 | P13632 | P13651 | P13765 | P13779 | P13830 | P13895 | P14202 |
| P14285 | P14376 | P14422 | P14432 | P14680 | P15287 | P15379 | P15442 | P15443 | P15711 |
| P15921 | P16010 | P16405 | P16452 | P16462 | P16497 | P16563 | P16789 | P16945 | P17261 |
| P17423 | P18009 | P18060 | P18091 | P18106 | P18150 | P18160 | P18294 | P18431 | P18475 |
| P18622 | P18790 | P19256 | P19361 | P19390 | P19525 | P19617 | P19680 | P19807 | P19812 |
| P19829 | P19895 | P20007 | P20020 | P20037 | P20162 | P20485 | P20690 | P20736 | P20794 |
| P21077 | P21250 | P21268 | P21293 | P21505 | P21778 | P21849 | P21854 | P21860 | P21893 |
| P21919 | P21978 | P22006 | P22040 | P22080 | P22081 | P22216 | P22804 | P23292 | P23354 |
| P23497 | P23504 | P23525 | P23561 | P23588 | P23647 | P23735 | P24005 | P24081 | P24521 |
| P24587 | P24719 | P24814 | P24852 | P25055 | P25332 | P25333 | P25359 | P25360 | P25386 |
| P25574 | P25848 | P26266 | P26362 | P26401 | P26403 | P26842 | P26948 | P27206 | P27426 |
| P27613 | P27801 | P28067 | P28068 | P28284 | P28627 | P28707 | P28708 | P28722 | P28791 |
| P28925 | P28966 | P28990 | P29228 | P29481 | P29725 | P29939 | P30149 | P30203 | P30291 |
| P30344 | P30636 | P30847 | P31064 | P31106 | P31374 | P31492 | P31631 | P32011 | P32072 |
| P32225 | P32264 | P32350 | P32361 | P32368 | P32481 | P32562 | P32581 | P32600 | P32678 |
| P32742 | P32761 | P32790 | P32791 | P32801 | P32839 | P32866 | P32944 | P33015 | P33020 |
| P33116 | P33279 | P33288 | P33294 | P33698 | P33802 | P33941 | P33973 | P34101 | P34102 |
| P34103 | P34104 | P34125 | P34152 | P34167 | P34206 | P34244 | P34314 | P34333 | P34478 |
| P34544 | P34552 | P34576 | P34607 | P34635 | P34649 | P34749 | P34756 | P34892 | P34894 |
| P35114 | P35141 | P35202 | P35546 | P35578 | P35590 | P35597 | P35762 | P35790 | P35865 |
| P35983 | P36003 | P36028 | P36029 | P36096 | P36232 | P36497 | P36615 | P37034 | P37142 |
| P37297 | P37349 | P37433 | P37511 | P37562 | P37608 | P37624 | P37642 | P37661 | P37665 |
| P37669 | P37733 | P37739 | P37740 | P37908 | P38008 | P38080 | P38110 | P38147 | P38262 |
| P38292 | P38323 | P38324 | P38329 | P38360 | P38369 | P38623 | P38691 | P38692 | P38792 |
| P38912 | P38943 | P38970 | P38990 | P38993 | P39073 | P39075 | P39104 | P39241 | P39277 |
| P39282 | P39288 | P39314 | P39325 | P39542 | P39830 | P39838 | P39842 | P39928 | P39986 |
| P40034 | P40036 | P40075 | P40107 | P40217 | P40259 | P40318 | P40358 | P40433 | P40438 |
| P40445 | P40530 | P40548 | P40758 | P40876 | P40985 | P41060 | P41217 | P41218 | P41279 |
| P41374 | P41484 | P41720 | P41888 | P41949 | P42071 | P42159 | P42243 | P42245 | P42292 |
| P42356 | P42411 | P42424 | P42527 | P42951 | P43109 | P43403 | P43565 | P43568 | P43633 |
| P43682 | P44250 | P44482 | P44543 | P44622 | P44833 | P45249 | P45288 | P45394 | P45594 |
| P45951 | P45996 | P46026 | P46106 | P46136 | P46139 | P46224 | P46560 | P46599 | P46614 |
| P46680 | P46730 | P46920 | P46962 | P47042 | P47068 | P47104 | P47116 | P47260 | P47311 |
| P47391 | P47458 | P47545 | P48240 | P48479 | P48553 | P48960 | P48988 | P49025 | P49321 |
| P49594 | P49605 | P49657 | P49762 | P49982 | P50053 | P50186 | P50443 | P50541 | P50582 |
| P50636 | P51145 | P51321 | P51392 | P51813 | P51950 | P51957 | P52047 | P52101 | P52143 |
| P52446 | P52484 | P52560 | P52569 | P52636 | P52824 | P53009 | P53039 | P53063 | P53109 |
| P53119 | P53153 | P53170 | P53193 | P53233 | P53235 | P53273 | P53281 | P53331 | P53394 |
| P53599 | P53739 | P53746 | P53801 | P53838 | P53904 | P53925 | P54190 | P54199 | P54211 |
| P54301 | P54302 | P54352 | P54674 | P54677 | P54734 | P54736 | P54738 | P54742 | P54883 |
| P55183 | P55471 | P55568 | P55669 | P55734 | P55824 | P55827 | P55829 | P55835 | P55839 |
| P55884 | P55980 | P56287 | P56288 | P56848 | P56975 | P57034 | P57041 | P57058 | P57078 |
| P57217 | P57368 | P57993 | P58216 | P58593 | P58754 | P59025 | P59114 | P59963 | P60008 |
| P61170 | P61325 | P61584 | P61916 | P63358 | P63391 | P63399 | P63770 | P64144 | P65007 |
| P65371 | P65733 | P65930 | P67117 | P67730 | P68746 | P69525 | P70715 | P70718 | P70954 |
| P71356 | P72732 | P73009 | P73450 | P73515 | P73771 | P74297 | P74436 | P75109 | P75205 |
| P75264 | P75444 | P75516 | P75524 | P75551 | P75613 | P75785 | P75835 | P75955 | P76014 |
| P76016 | P76042 | P76219 | P76221 | P76236 | P76335 | P76339 | P76419 | P77172 | P77269 |
| P77400 | P77493 | P77504 | P77510 | P77536 | P77599 | P77866 | P78395 | P79280 | P80197 |
| P80444 | P80659 | P81344 | P81346 | P81958 | P82602 | P83075 | P83097 | P83102 | P83103 |
| P83736 | P83977 | P83985 | P84731 | P87050 | P87295 | P88963 | P90495 | P91133 | P91167 |
| P91928 | P94799 | P96661 | P96680 | P97364 | P97793 | P98153 | P98160 | Q00094 | Q00095 |
| Q00366 | Q00497 | Q00537 | Q00595 | Q00609 | Q00964 | Q01000 | Q01013 | Q01151 | Q01389 |
| Q01397 | Q01583 | Q01590 | Q01621 | Q01969 | Q02073 | Q02099 | Q02192 | Q02595 | Q02725 |
| Q02907 | Q02937 | Q02938 | Q02952 | Q03002 | Q03016 | Q03043 | Q03102 | Q03193 | Q03215 |
| Q03228 | Q03264 | Q03306 | Q03435 | Q03533 | Q03563 | Q03650 | Q03697 | Q03702 | Q03730 |
| Q03778 | Q03877 | Q04216 | Q04432 | Q04491 | Q04594 | Q04637 | Q04641 | Q04800 | Q04835 |
| Q04839 | Q04956 | Q05084 | Q05181 | Q05439 | Q05609 | Q05652 | Q05672 | Q05999 | Q06067 |
| Q06098 | Q06147 | Q06169 | Q06328 | Q06648 | Q06651 | Q06850 | Q06904 | Q07071 | Q07108 |
| Q07292 | Q07408 | Q07444 | Q07457 | Q07617 | Q07622 | Q07835 | Q07837 | Q07929 | Q07963 |
| Q08017 | Q08109 | Q08213 | Q08224 | Q08430 | Q08444 | Q08722 | Q08732 | Q08794 | Q08853 |

|        |        |        |        |        |        |        |        |        |        |
|--------|--------|--------|--------|--------|--------|--------|--------|--------|--------|
| Q08D99 | Q08DV0 | Q09092 | Q09103 | Q09298 | Q09349 | Q09427 | Q09488 | Q09573 | Q09629 |
| Q09639 | Q09690 | Q09722 | Q09738 | Q09766 | Q09809 | Q09879 | Q09898 | Q09931 | Q0H8X2 |
| Q0H8X7 | Q0H8X8 | Q0H8X9 | Q0H8Y3 | Q0H8Z3 | Q0P496 | Q0P4K8 | Q0P5H8 | Q0V8S0 | Q0VCA9 |
| Q0VCB1 | Q0VCR6 | Q0VD34 | Q0VD42 | Q0WNY5 | Q10124 | Q10156 | Q10169 | Q10242 | Q10357 |
| Q10435 | Q10447 | Q10475 | Q10699 | Q10875 | Q10900 | Q10925 | Q11076 | Q11090 | Q12003 |
| Q12149 | Q12220 | Q12236 | Q12263 | Q12265 | Q12277 | Q12298 | Q12310 | Q12333 | Q12373 |
| Q12449 | Q12469 | Q12471 | Q12505 | Q12674 | Q12675 | Q12697 | Q12745 | Q12802 | Q12866 |
| Q12929 | Q13023 | Q13099 | Q13164 | Q13191 | Q13233 | Q13308 | Q13309 | Q13323 | Q13470 |
| Q13523 | Q13546 | Q13554 | Q14004 | Q14008 | Q14152 | Q14247 | Q14296 | Q14669 | Q149N8 |
| Q14CZ7 | Q15075 | Q15118 | Q15643 | Q15645 | Q15652 | Q15750 | Q15762 | Q15814 | Q16667 |
| Q16943 | Q17632 | Q19192 | Q19238 | Q19266 | Q1BYA7 | Q1JPH6 | Q1KKW7 | Q1RJB3 | Q1S9I9 |
| Q21735 | Q22258 | Q22366 | Q22647 | Q22695 | Q23977 | Q24145 | Q24572 | Q24592 | Q24740 |
| Q25479 | Q26539 | Q26768 | Q27178 | Q27324 | Q27489 | Q28205 | Q28433 | Q29RU0 | Q2EHL8 |
| Q2FED6 | Q2HJA8 | Q2J862 | Q2JJ30 | Q2KIU0 | Q2KJF7 | Q2LGB3 | Q2QTC2 | Q2T9U5 | Q2U9B0 |
| Q32KS0 | Q32L68 | Q32L97 | Q32LN5 | Q32MK0 | Q38419 | Q38SD2 | Q3IEY8 | Q3J6C1 | Q3L8P3 |
| Q3LRP3 | Q3SWZ4 | Q3SX26 | Q3SY52 | Q3SZI1 | Q3SZJ2 | Q3SZM9 | Q3T133 | Q3U145 | Q3UF64 |
| Q3UGM2 | Q3UV71 | Q3V129 | Q3ZBG5 | Q3ZC12 | Q3ZCF3 | Q40545 | Q42736 | Q44636 | Q44848 |
| Q46036 | Q46L57 | Q47068 | Q47162 | Q47377 | Q49396 | Q49430 | Q496M5 | Q49MI3 | Q49VU5 |
| Q4A0G5 | Q4IK03 | Q4JU24 | Q4P0K0 | Q4PH16 | Q4R5B8 | Q4V7X9 | Q4VBH4 | Q4VSN4 | Q4WHB7 |
| Q502L7 | Q504Y2 | Q50585 | Q50862 | Q50863 | Q50864 | Q52107 | Q52664 | Q52665 | Q52969 |
| Q53R41 | Q55774 | Q55NZ6 | Q561M0 | Q56646 | Q56902 | Q56JZ5 | Q56UN5 | Q57190 | Q571I4 |
| Q571K4 | Q57242 | Q57519 | Q57710 | Q57PI7 | Q57QC4 | Q58030 | Q58129 | Q58387 | Q58957 |
| Q59014 | Q59081 | Q59263 | Q59H18 | Q5AGC7 | Q5B367 | Q5B8L2 | Q5E999 | Q5E9D0 | Q5EA99 |
| Q5EAB0 | Q5EAK6 | Q5F349 | Q5F361 | Q5F3W3 | Q5F486 | Q5GLZ8 | Q5HEI2 | Q5K4L6 | Q5KBI0 |
| Q5KFEO | Q5KJQ4 | Q5KSL6 | Q5M775 | Q5PH63 | Q5QJ74 | Q5R9A7 | Q5R9W2 | Q5REG1 | Q5RKV6 |
| Q5S007 | Q5S7T7 | Q5T0T0 | Q5T3F8 | Q5T447 | Q5TCY1 | Q5U5R9 | Q5U651 | Q5UNT7 | Q5UNZ1 |
| Q5UPT4 | Q5UPU3 | Q5UPW7 | Q5UPY4 | Q5UPZ2 | Q5UQ57 | Q5UQ77 | Q5UQ88 | Q5UQ94 | Q5UQC1 |
| Q5UQJ6 | Q5UQM4 | Q5UQR3 | Q5UQW7 | Q5UR39 | Q5UR48 | Q5VK71 | Q5VT25 | Q5VU65 | Q5VWQ8 |
| Q5WL39 | Q5XPI4 | Q5Z6B1 | Q5Z987 | Q5ZJB4 | Q5ZJS6 | Q5ZLP2 | Q5ZPR3 | Q60030 | Q60053 |
| Q60337 | Q60739 | Q60767 | Q61476 | Q61K76 | Q62101 | Q62137 | Q621J7 | Q62388 | Q62407 |
| Q62472 | Q62IJ6 | Q63111 | Q63572 | Q63994 | Q63A51 | Q641K5 | Q66T72 | Q6ARA9 | Q6AYH3 |
| Q6AZD4 | Q6BH37 | Q6BLM3 | Q6BV76 | Q6CAD2 | Q6CFE7 | Q6CNN5 | Q6CSA1 | Q6D8D5 | Q6DCL5 |
| Q6DH44 | Q6F1S1 | Q6FNV5 | Q6FX42 | Q6FY22 | Q6G0G3 | Q6GED5 | Q6IQ26 | Q6J9G1 | Q6L5D4 |
| Q6MAN0 | Q6NJ43 | Q6NYK8 | Q6P4S6 | Q6PAQ4 | Q6PEI3 | Q6PGG2 | Q6QC00 | Q6RYW5 | Q6STE5 |
| Q6TEM9 | Q6UX27 | Q6UXF1 | Q6UXZ0 | Q6UY09 | Q6WKZ4 | Q6XE24 | Q6YHK3 | Q6YXY2 | Q6ZMT4 |
| Q6ZNA4 | Q70EK8 | Q70FG9 | Q70PP2 | Q71H61 | Q754T3 | Q756G2 | Q75CC8 | Q75CQ8 | Q75D46 |
| Q75LI2 | Q76E23 | Q76N89 | Q7AJA5 | Q7BCK4 | Q7JVI3 | Q7KRY6 | Q7L622 | Q7L8L6 | Q7MV19 |
| Q7RZT9 | Q7T0B0 | Q7T6X2 | Q7TMI3 | Q7TMJ8 | Q7TMY8 | Q7TT18 | Q7TXA9 | Q7UFZ2 | Q7VL53 |
| Q7VNT5 | Q7WR85 | Q7XRU4 | Q7YU24 | Q7Z2X4 | Q7Z2Y5 | Q7Z419 | Q7Z465 | Q7Z692 | Q7Z695 |
| Q7ZW16 | Q7ZYJ3 | Q80V03 | Q80XG9 | Q80YE7 | Q80ZI6 | Q82AG6 | Q83IA0 | Q84JU6 | Q84V18 |
| Q84Y18 | Q86MW9 | Q86TB3 | Q86UR5 | Q86UX6 | Q86WB0 | Q86WC6 | Q86XD8 | Q86Y13 | Q86YD3 |
| Q874C1 | Q893Q9 | Q89A17 | Q89AD1 | Q8AXY6 | Q8AYG3 | Q8BG60 | Q8BGN6 | Q8BH01 | Q8BKX6 |
| Q8BLK3 | Q8BMZ5 | Q8BVE8 | Q8BX57 | Q8BY79 | Q8BZT2 | Q8CEE6 | Q8CGF5 | Q8CI61 | Q8CJ53 |
| Q8G4G1 | Q8G5X4 | Q8G838 | Q8GGL1 | Q8GUQ5 | Q8GY23 | Q8HSW1 | Q8HVK8 | Q8HY03 | Q8IR79 |
| Q8ISF8 | Q8IU80 | Q8IV63 | Q8IVH8 | Q8IW41 | Q8IWF7 | Q8IWL3 | Q8IWU2 | Q8IX05 | Q8IZ96 |
| Q8IZR5 | Q8IZV2 | Q8JFV8 | Q8JZW8 | Q8K1R7 | Q8K450 | Q8KA87 | Q8KAW7 | Q8KG79 | Q8L4H4 |
| Q8L5Y9 | Q8L718 | Q8L850 | Q8LBB2 | Q8LBL5 | Q8LE94 | Q8LJT8 | Q8LPT9 | Q8MR31 | Q8MT36 |
| Q8MYQ1 | Q8N0W3 | Q8N1G1 | Q8N3G9 | Q8N568 | Q8NA54 | Q8NA82 | Q8NBS3 | Q8NCE0 | Q8NE28 |
| Q8NG66 | Q8NHG8 | Q8PK29 | Q8PNH3 | Q8PTT8 | Q8PZ69 | Q8PZI1 | Q8R550 | Q8R5A3 | Q8R5N8 |
| Q8RQL4 | Q8RY67 | Q8S403 | Q8T0S6 | Q8TAD8 | Q8TAG5 | Q8TAQ2 | Q8TAS1 | Q8TAZ6 | Q8TBB1 |
| Q8TBE7 | Q8TDC3 | Q8TDZ2 | Q8TE04 | Q8TF76 | Q8TGY9 | Q8TK65 | Q8TR06 | Q8TZB3 | Q8VC56 |
| Q8VDX6 | Q8VHF0 | Q8VIG6 | Q8VL02 | Q8VY05 | Q8VZ40 | Q8W2F3 | Q8WUG5 | Q8WUJ0 | Q8WWG1 |
| Q8WWV3 | Q8WXI2 | Q8X1E6 | Q8X5R9 | Q8X6R9 | Q8X6V3 | Q8X8G6 | Q8XBV9 | Q8XJL8 | Q8XN03 |
| Q8XU11 | Q8XX83 | Q8Y0M0 | Q8YD73 | Q8Z6P7 | Q8ZBM0 | Q91618 | Q91VE6 | Q91VK4 | Q91ZU6 |
| Q920P5 | Q92212 | Q92213 | Q92266 | Q92667 | Q926C3 | Q92JG1 | Q92JP8 | Q92ZT0 | Q93IE8 |
| Q93Z13 | Q93Z66 | Q94125 | Q94AU2 | Q95050 | Q95L46 | Q95MP0 | Q95Q98 | Q95SP2 | Q95UN8 |
| Q95YI5 | Q95ZQ4 | Q969G3 | Q969I6 | Q96A29 | Q96BF3 | Q96BH1 | Q96D53 | Q96DZ9 | Q96EP1 |
| Q96GX5 | Q96JH7 | Q96L96 | Q96LW7 | Q96M32 | Q96NA2 | Q96PY6 | Q96QF0 | Q96QP1 | Q96QV1 |
| Q96QZ7 | Q96RR4 | Q96RY7 | Q96S38 | Q96T58 | Q97BQ3 | Q97P44 | Q98I54 | Q98QW4 | Q98ST5 |
| Q99189 | Q99385 | Q99435 | Q99467 | Q99558 | Q99570 | Q99759 | Q99795 | Q99942 | Q99996 |
| Q99J86 | Q99L47 | Q99LJ5 | Q99MQ3 | Q99P91 | Q9AL99 | Q9ASX5 | Q9BQA5 | Q9BRS2 | Q9BTE1 |
| Q9BVS4 | Q9BX93 | Q9BXU1 | Q9BY77 | Q9BYE2 | Q9BYK8 | Q9BYT3 | Q9BZD7 | Q9BZF9 | Q9BZM2 |
| Q9C098 | Q9C0K7 | Q9CGE3 | Q9CNP2 | Q9CWK3 | Q9CZX5 | Q9D0K1 | Q9D2Y4 | Q9D733 | Q9D8T7 |
| Q9DAS4 | Q9DBH5 | Q9DCJ7 | Q9DE14 | Q9DEI1 | Q9EPQ2 | Q9ERA6 | Q9ERE9 | Q9ESL4 | Q9ESN9 |
| Q9EVN3 | Q9EXQ1 | Q9FAB3 | Q9FIY7 | Q9FY46 | Q9GKI7 | Q9GKZ4 | Q9H074 | Q9HOC8 | Q9HOC2 |
| Q9H295 | Q9H2D6 | Q9H2G2 | Q9H2Y9 | Q9H422 | Q9H479 | Q9H4A3 | Q9H4L7 | Q9H6Y7 | Q9H792 |
| Q9H7Z6 | Q9H9L3 | Q9HB10 | Q9HBA9 | Q9HBG6 | Q9HBG7 | Q9HBL6 | Q9HCI5 | Q9HCK5 | Q9HCN3 |
| Q9HCU5 | Q9HDC9 | Q9HFF4 | Q9HG09 | Q9HKY3 | Q9HNN8 | Q9HTX3 | Q9I7F7 | Q9J5B1 | Q9JHR9 |

|        |        |        |        |        |        |        |        |        |        |
|--------|--------|--------|--------|--------|--------|--------|--------|--------|--------|
| Q9JI90 | Q9JLN5 | Q9JLT6 | Q9JLV1 | Q9JLV6 | Q9JM01 | Q9JRP9 | Q9KFF1 | Q9KPI5 | Q9KVI9 |
| Q9KWM8 | Q9L473 | Q9LKI5 | Q9LN71 | Q9LNE4 | Q9LRB7 | Q9LX30 | Q9LYU8 | Q9M081 | Q9M3G7 |
| Q9M3H5 | Q9MA15 | Q9NB71 | Q9NH13 | Q9NI63 | Q9NIV1 | Q9NLA1 | Q9NPC3 | Q9NPF0 | Q9NPJ1 |
| Q9NQC7 | Q9NR48 | Q9NRA0 | Q9NRH2 | Q9NRP7 | Q9NS56 | Q9NS61 | Q9NSE7 | Q9NSU2 | Q9NSY1 |
| Q9NW38 | Q9NWF9 | Q9NYB0 | Q9NYY8 | Q9NZ20 | Q9NZC9 | Q9P0M2 | Q9P0M6 | Q9P286 | Q9P2D0 |
| Q9P2H3 | Q9P3U0 | Q9P4Z1 | Q9P6Y2 | Q9P7Q7 | Q9P7S5 | Q9P7V9 | Q9P7X5 | Q9PIN2 | Q9PJ54 |
| Q9PJH1 | Q9PK27 | Q9PL45 | Q9PPN9 | Q9PQV8 | Q9QUN5 | Q9QUR7 | Q9QXK2 | Q9QXL8 | Q9QY17 |
| Q9QZ05 | Q9R0A0 | Q9R1A8 | Q9R1N3 | Q9RI12 | Q9RUE8 | Q9S3R9 | Q9SCY5 | Q9SPL2 | Q9T074 |
| Q9T0G7 | Q9TT99 | Q9TV52 | Q9TVW2 | Q9TY95 | Q9U1Y5 | Q9U308 | Q9U8G7 | Q9UBL3 | Q9UGJ0 |
| Q9UGN4 | Q9UHB6 | Q9UHD2 | Q9UHI5 | Q9UHK0 | Q9UHN6 | Q9UKG1 | Q9UL54 | Q9ULT8 | Q9ULU4 |
| Q9ULV3 | Q9UR66 | Q9US59 | Q9UST1 | Q9UTH3 | Q9V3I5 | Q9V3Q6 | Q9V4L4 | Q9V853 | Q9V8P9 |
| Q9VB08 | Q9VBW3 | Q9VEZ5 | Q9VH48 | Q9VHH9 | Q9VN14 | Q9VPC0 | Q9VR91 | Q9VRP9 | Q9VRX3 |
| Q9VUX2 | Q9VW97 | Q9VXG8 | Q9VXK6 | Q9VXY2 | Q9VYD1 | Q9W0K0 | Q9W0S9 | Q9W0V1 | Q9W391 |
| Q9WTJ4 | Q9WX70 | Q9XHM1 | Q9XJJ7 | Q9XT50 | Q9Y237 | Q9Y2A5 | Q9Y2B0 | Q9Y2I7 | Q9Y2S7 |
| Q9Y2U8 | Q9Y3A4 | Q9Y3A6 | Q9Y3R0 | Q9Y484 | Q9Y4P8 | Q9Y572 | Q9Y616 | Q9Y6J8 | Q9Y6R4 |
| Q9Y6Y8 | Q9Y7W4 | Q9YAW0 | Q9YC05 | Q9YDD2 | Q9YDY8 | Q9YG68 | Q9Z172 | Q9Z1S0 | Q9Z1W9 |
| Q9Z1Z2 | Q9Z3D6 | Q9Z3Q5 | Q9Z6U5 | Q9ZCI7 | Q9ZHD4 | Q9ZZX0 |        |        |        |

Classification information of 138 transcription factor

TF with Basic domains (37)

|        |        |        |        |        |        |        |        |        |        |
|--------|--------|--------|--------|--------|--------|--------|--------|--------|--------|
| P04198 | P11115 | P14232 | P20824 | Q04667 | P19532 | P11420 | P21525 | P13098 | P16443 |
| P22816 | P41546 | P52890 | P09775 | P18846 | P25032 | Q01664 | P13526 | P20482 | P54845 |
| P22560 | P25302 | P03206 | P13902 | P17861 | P16220 | P22697 | P14233 | P35869 | P01102 |
| P19880 | P26798 | Q15853 | P18491 | P29303 | P36622 | P46581 |        |        |        |

TF with Beta-Scaffold factors (32)

|        |        |        |        |        |        |        |        |        |        |
|--------|--------|--------|--------|--------|--------|--------|--------|--------|--------|
| P35710 | Q40479 | O82132 | P13002 | P16236 | P25799 | Q13952 | P04637 | P36611 | P43680 |
| Q05066 | P20227 | P27347 | Q03017 | Q63046 | P10840 | Q40476 | P11831 | P20749 | P35632 |
| P42232 | P93835 | Q40478 | Q07472 | Q05344 | P11746 | P15330 | P25042 | Q05738 | P42230 |
| Q40477 | Q06945 |        |        |        |        |        |        |        |        |

TF with Helix-turn-helix (36)

|        |        |        |        |        |        |        |        |        |        |
|--------|--------|--------|--------|--------|--------|--------|--------|--------|--------|
| P09077 | P28167 | P97503 | P10181 | P22810 | P31367 | P39880 | Q02283 | P09085 | P18488 |
| P24345 | P28362 | Q01094 | Q60987 | P01105 | P07269 | P14734 | P22121 | P29454 | P46692 |
| Q05466 | P02836 | P07548 | P17433 | P23683 | P41934 | P05552 | P31260 | P49640 | Q01822 |
| Q05950 | P10961 | P27898 | Q04650 | P10180 | P19419 |        |        |        |        |

TF with Zinc-coordinating DNA binding domains (33)

|        |        |        |        |        |        |        |        |        |        |
|--------|--------|--------|--------|--------|--------|--------|--------|--------|--------|
| P18102 | P23803 | P42282 | P07247 | P51179 | P14404 | P10508 | P32338 | Q24142 | P05085 |
| P11638 | P36627 | P27705 | P34708 | Q03164 | P10071 | P15370 | P19212 | P37826 | P08638 |
| P23769 | P06401 | P12351 | P39001 | Q01981 | P04386 | P11161 | P18146 | P21192 | Q60793 |
| P07248 | P13054 | P51843 |        |        |        |        |        |        |        |
